# Supplementary material
Source: PubMed Central journal article supplement (PMC3842576)
Supplement: 97320630009908S1.pdf [file 97320630009908S1.pdf]

## Supplementary material:

### Methodology:

#### Docking the ligand molecule with BDNF

|                                              |                                                                                                                                           |
|----------------------------------------------|-------------------------------------------------------------------------------------------------------------------------------------------|
| Eintra is the internal energy of the ligand: | $E_{intra} = \sum_{i \in \text{ligand}} E_{PLP}(r_{ij}) + \sum_{j \in \text{protein}} A 1 - \cos(m \cdot \theta - \theta_0)  + E_{clash}$ |
|----------------------------------------------|-------------------------------------------------------------------------------------------------------------------------------------------|

**Table 1:** Cavities and Highest binding energies of Omega-3 PUFA (ligand)

| S.No | Omega-3 PUFA(Ligand)                                       | Cavity   | Binding Energy (kcal/mol) |
|------|------------------------------------------------------------|----------|---------------------------|
| 1    | (5Z,7E,9E,14Z,17Z)-Eicosapentaenoic acid(5282061)          | cavity_2 | -160.226                  |
| 2    | 11,14,17,-Eicosatrienoic acid(5312529)                     | cavity_1 | -159.692                  |
| 3    | 12-Hydroxy-5,8,10,14-Eicosatetraenoic acid(5312983)        | cavity_1 | -175.795                  |
| 4    | 15-Hydroperoxy-5,8,11,14,17-Eicosapentaenoic acid(6438853) | cavity_1 | -168.305                  |
| 5    | 18-Hydroxy-5,8,11,14-Eicosatetraenoic acid(6442778)        | cavity_1 | -155.303                  |
| 6    | Alpha-linolenic acid(860)                                  | cavity_1 | -155.405                  |
| 7    | Docosahexaenoic acid(445580)                               | cavity_4 | -171.42                   |
| 8    | Docosapentaenoic acid (5497182)                            | cavity_1 | -164.931                  |
| 9    | Eicosapentaenoic acid(446284)                              | cavity_1 | -162.239                  |
| 10   | Stearidonic acid(5312508)                                  | cavity_1 | -153.456                  |

**Table 2:** Cavities and Highest binding energies of Omega-6 PUFA (Ligand)

| S.No | Omega-6 PUFAS(Ligand)                           | Cavity   | Binding Energy (kcal/mol) |
|------|-------------------------------------------------|----------|---------------------------|
| 1.   | 7,10,13,16-Docosapentaenoic acid-4(5282848)     | cavity_1 | -164.87                   |
| 2.   | 8,11,14-Eicosatrienoc acid(5280581)             | cavity_2 | -148.456                  |
| 3.   | Arachidonic acid(444899)                        | cavity_3 | -158.436                  |
| 4.   | Docosa-4,7,10,13,16- pentaenoic acid_ (5282848) | cavity_1 | -170.703                  |
| 5.   | Gamma-Linolenic acid (5280933)                  | cavity_1 | -150.726                  |
| 6.   | Linoleic acid(5280934)                          | cavity_1 | -154.523                  |

**Table 3:** Cavities and Highest binding energies of Metabolites (Ligand)

| S.No | Metabolite (Ligand) | Cavity | Binding Energy (kcal/mol) |
|------|---------------------|--------|---------------------------|
| 1    | LXA_4(5280914)      | cav_1  | -202.888                  |
| 2    | NPD (16042541)      | cav_1  | -183.325                  |
| 3    | HDHA (24875301)     | Cav_1  | -182.36                   |
